# Supplementary material for: Development of SnO2 Composites as Electron Transport Layer in Unencapsulated CH3NH3PbI3 Solar Cells
Source: MDPI journal article supplement (doi:10.3390/solids2040026), 2021-12-15
Supplement: s1 [file s1]

## Supporting info

# Development of SnO<sub>2</sub> composites as electron transport layer in un-encapsulated CH<sub>3</sub>NH<sub>3</sub>PbI<sub>3</sub> solar cells

Gennaro V. Sannino,<sup>1,2</sup> Antonella De Maria,<sup>1</sup> Vera La Ferrara,<sup>1\*</sup> Gabriella Rametta,<sup>1</sup> Lucia V. Mercaldo,<sup>1</sup> Maria Luisa Addonizio,<sup>1</sup> Laura Lancellotti,<sup>1</sup> Adriana Pecoraro,<sup>3</sup> Ana B. Muñoz-García,<sup>3</sup> Michele Pavone,<sup>2</sup> and Paola Delli Veneri <sup>1</sup>

<sup>1</sup> Italian National Agency for New Technologies, Energy and Sustainable Economic Development (ENEA) - Portici Research Center, Piazzale E. Fermi, 80055 Portici (Na), Italy

<sup>2</sup> Department of Chemical Sciences, University of Naples Federico II, Comp. Univ. Monte Sant'Angelo, Via Cintia 21, Naples, Italy

<sup>3</sup> Department of Physics "Ettore Pancini", University of Naples Federico II, Comp. Univ. Monte Sant'Angelo, Via Cintia 21, Naples, Italy

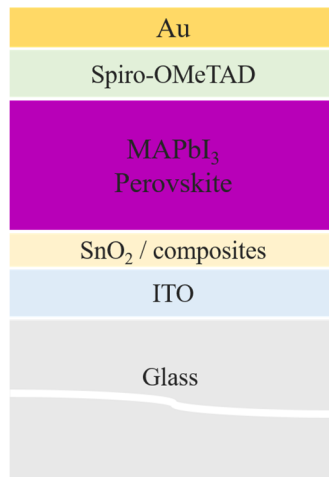

**Figure S1.** PSC with n-i-p configuration adopted for our devices

a)

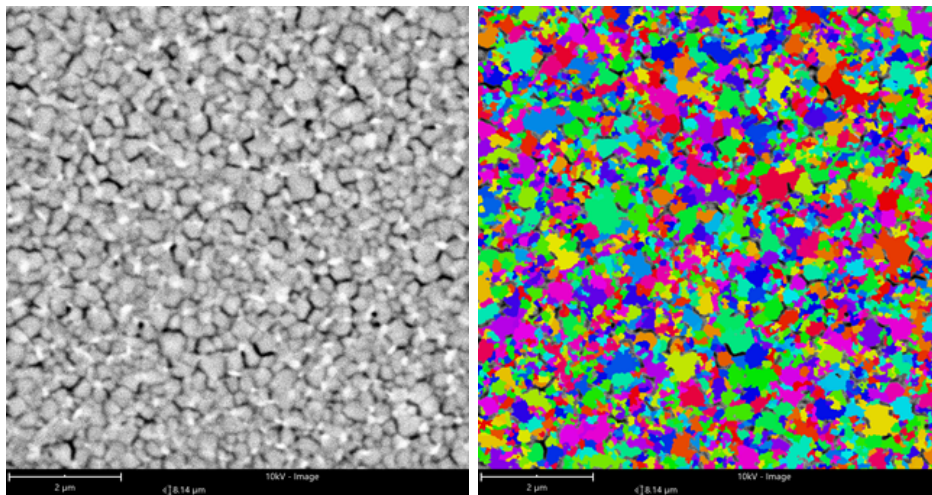

b)

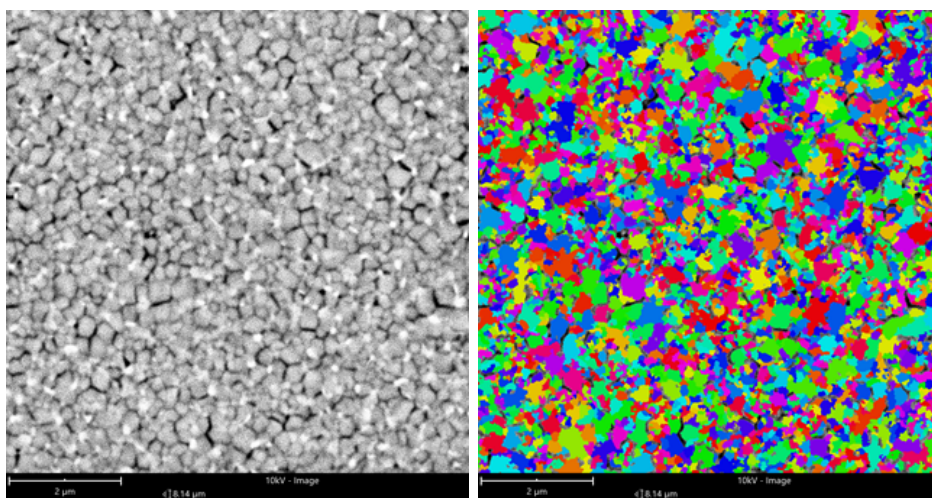

c)

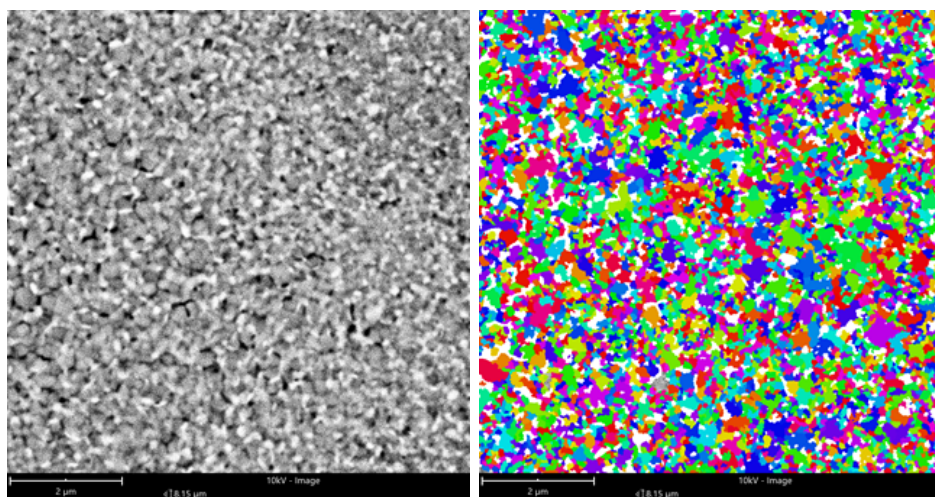

**Figure S2.** Grain size analysis of MAPbI<sub>3</sub> crystals growth on SnO<sub>2</sub> (a), SnO<sub>2</sub>:In<sub>2</sub>O<sub>3</sub> (b) and SnO<sub>2</sub>:ZnO (c) ETLs. Data are shown in Table S1.

**Table S1.** Average value of perovskite grain sizes weighted by count.

| ETL                                              | Area [ $\mu\text{m}^2$ ] | Major axis [nm] | Minor axis [nm] |
|--------------------------------------------------|--------------------------|-----------------|-----------------|
| SnO <sub>2</sub>                                 | 0.026                    | 236             | 116             |
| SnO <sub>2</sub> :In <sub>2</sub> O <sub>3</sub> | 0.024                    | 216             | 112             |
| SnO <sub>2</sub> :ZnO                            | 0.017                    | 177             | 99              |

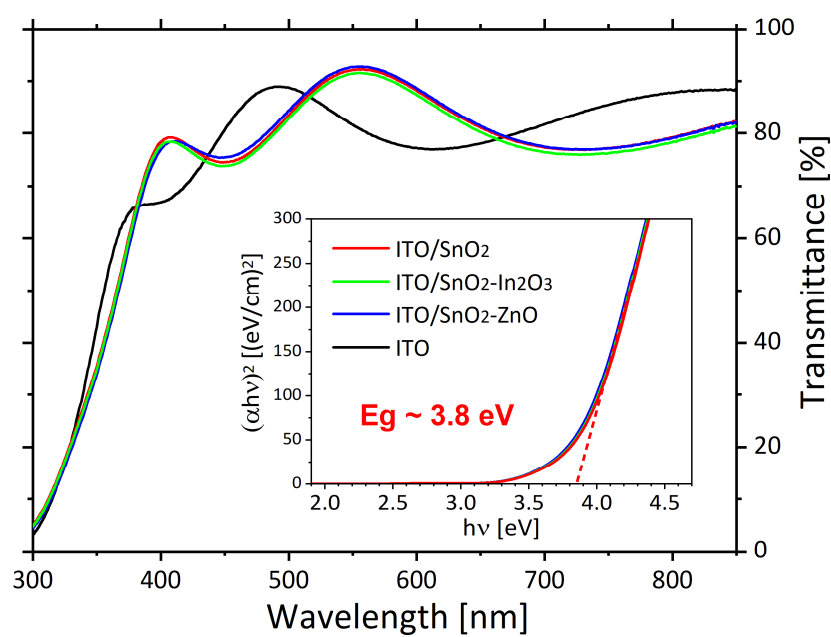

**Figure S3.** UV-vis transmission spectra of ETLs on ITO coated glass substrates and Tauc's plot (inset).

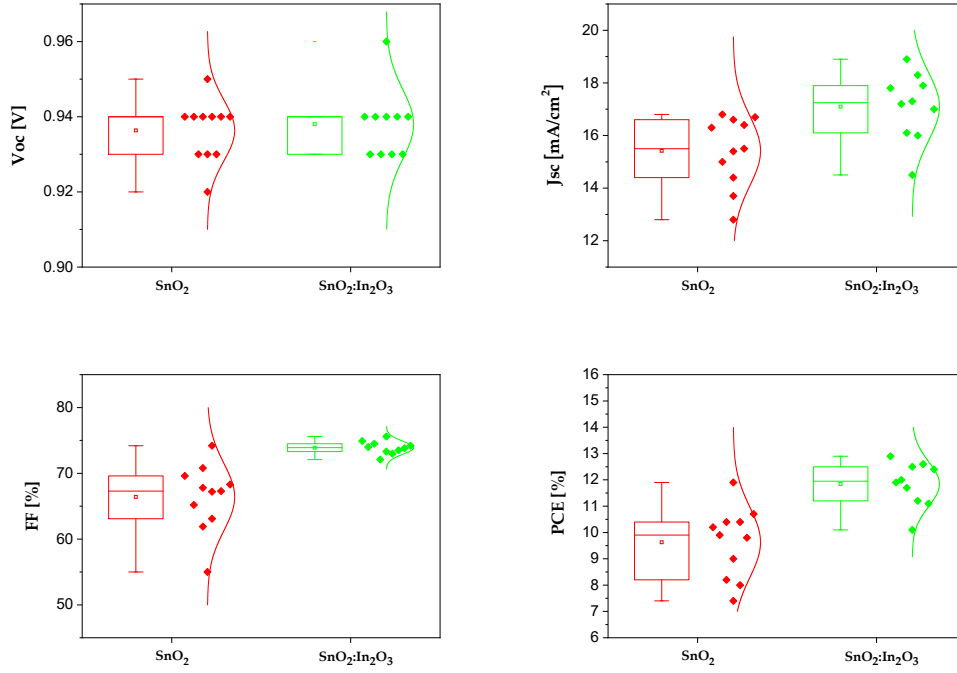

**Figure S4.** PV parameters of SnO<sub>2</sub> (in red) and SnO<sub>2</sub>:In<sub>2</sub>O<sub>3</sub> (in green) as different ETL for perovskite solar cells. Data are shown in Table S2.

**Table S2.** Average data and standard deviation extracted from J-V measurements of SnO<sub>2</sub> and SnO<sub>2</sub>:In<sub>2</sub>O<sub>3</sub>-based PSCs.

| ETL                                              | n. samples | Jsc [mA/cm <sup>2</sup> ] | Voc [V]     | FF [%] | PCE [%]    |
|--------------------------------------------------|------------|---------------------------|-------------|--------|------------|
| SnO <sub>2</sub>                                 | 11         | 15.4 ± 1.3                | 0.94 ± 0.01 | 66 ± 5 | 9.6 ± 1.3  |
| SnO <sub>2</sub> :In <sub>2</sub> O <sub>3</sub> | 10         | 17.1 ± 1.3                | 0.94 ± 0.01 | 74 ± 1 | 11.8 ± 0.8 |

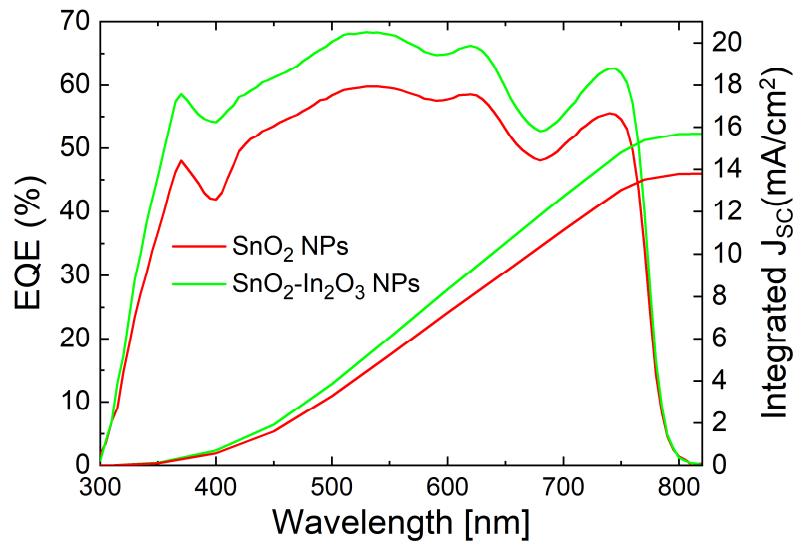

**Figure S5.** EQE spectra for SnO<sub>2</sub> (in red) and SnO<sub>2</sub>:In<sub>2</sub>O<sub>3</sub> (in green) based PSCs.
